# Supplementary material
Source: PubMed Central journal article supplement (PMC7152776)
Supplement: supp_RA119.011850_157048_2_supp_479068_q62171.pdf [file supp_RA119.011850_157048_2_supp_479068_q62171.pdf]

## Supplemental Material

### **N-Domain Rearrangements within FepA during Ferric Enterobactin Transport**

Aritri Majumdar<sup>1</sup>, Vy Trinh<sup>2</sup>, Kyle J. Moore<sup>3</sup>, Chuck R. Smallwood<sup>4</sup>, Ashish Kumar<sup>1</sup>, Taihao Yang<sup>1</sup>,  
Daniel C. Scott<sup>5</sup>, Noah J. Long<sup>1</sup>, Salete M. Newton<sup>1</sup> and Phillip E. Klebba<sup>1\*</sup>

From the <sup>1</sup>Department of Biochemistry & Molecular Biophysics, Kansas State University, Manhattan, KS 66506; <sup>2</sup>Department of Chemistry & Biochemistry, University of Oklahoma, Norman, OK 73019; <sup>3</sup>Department of Chemistry, Physics & Engineering, Cameron University, Lawton, OK 73505; <sup>4</sup>Sandia National Laboratories, Albuquerque, NM 87185; <sup>5</sup>Howard Hughes Medical Institute, St. Jude Children's Research Hospital, Memphis, TN 38105.

*Running title: Site-directed Cys-pairs in FepA*

\*Corresponding Author: [peklebba@ksu.edu](mailto:peklebba@ksu.edu)

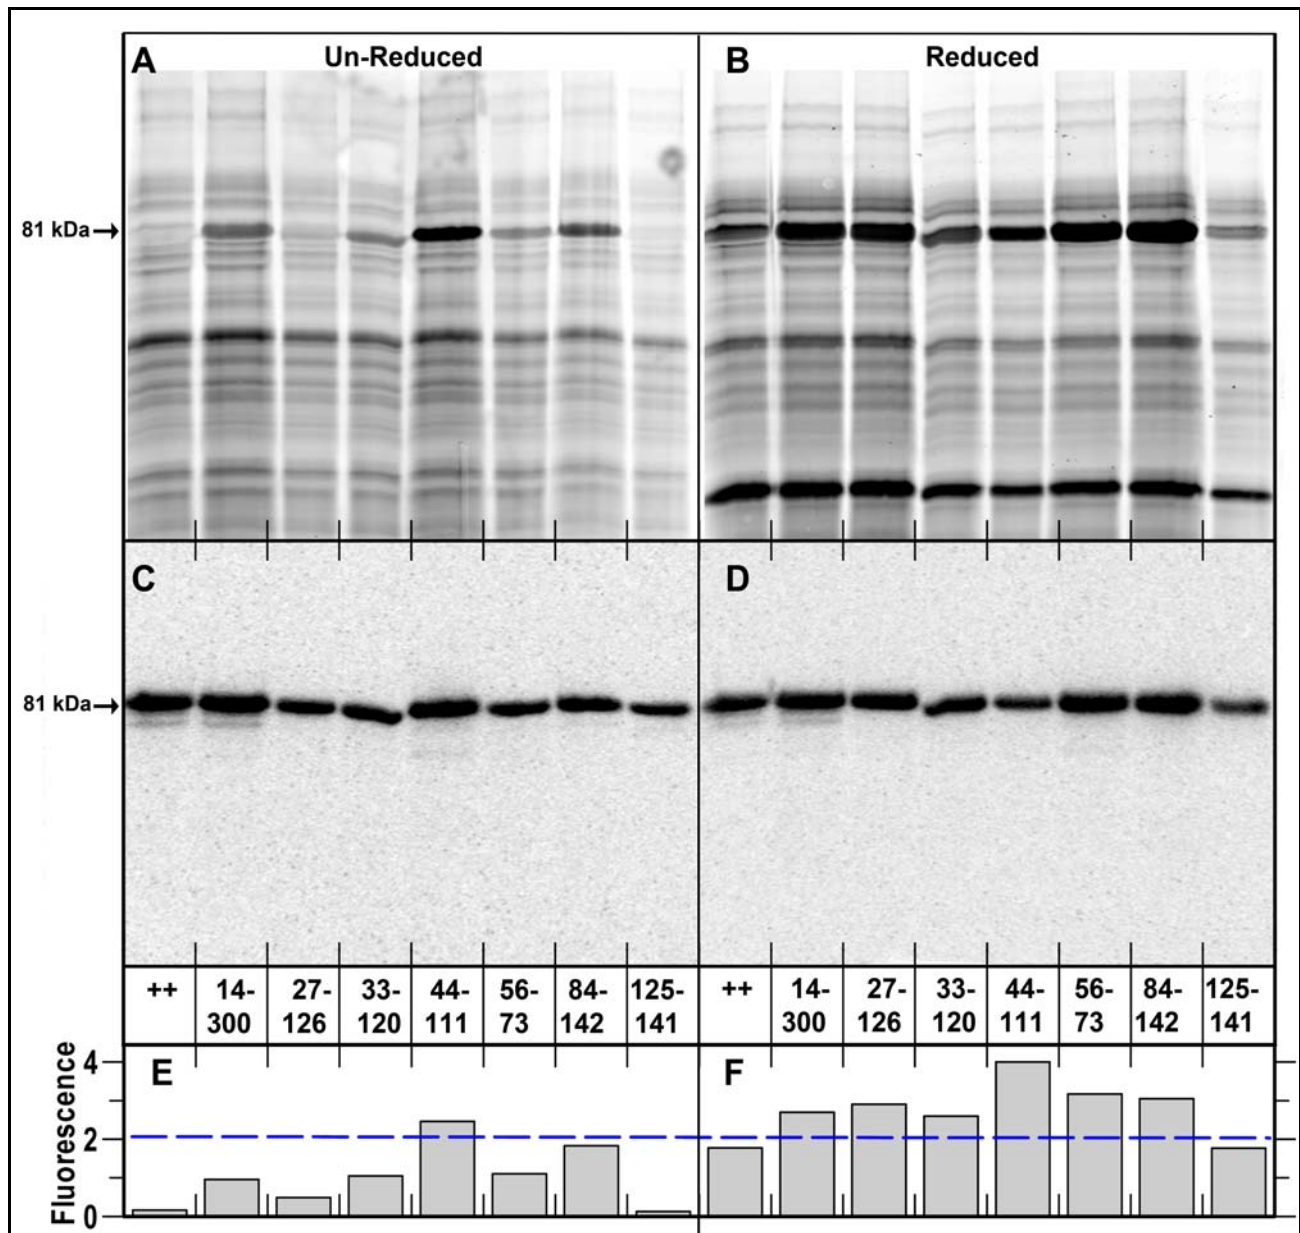

**Figure S1. FM labeling of FepA Cys-pair mutants.** We prepared cell envelopes from iron-deficient *E. coli* strains expressing FepA Cys-pair mutants and modified them with 5  $\mu$ M FM either before (non-reduced; **panel A**) or after (reduced; **panel B**) exposure to 10 mM  $\beta$ ME. After fluoresceination we resolved the proteins on SDS-PAGE gels and visualized fluorescence on a Typhoon imager at 520 nm, then transferred the proteins to NC and performed immunoblots with anti-FepA MABs 41 and 45 (72), visualized with [ $^{125}$ I]-protein A (**panels C and D**, respectively). This immunoblot, as well as the gel in panel A, contains wild-type FepA (++) that provides an internal molecular weight marker at 81.5 kDa (arrows). **Quantification of FM-labeling (panels E and F).** Using ImageJ, we determined the intensities of the FepA bands in panels A and C (un-reduced) and B and D (reduced), and calculated the relative amounts of free Cys (i.e., accessible to FM-labeling) for each mutant in both conditions. We arbitrarily set the fluorescence of the most heavily labeled protein (44-111) to a level of 4; the blue dashed line represents the expected fluorescence labeling of fully reduced wild-type FepA (++; 2 free Cys). See the text for additional explanations.

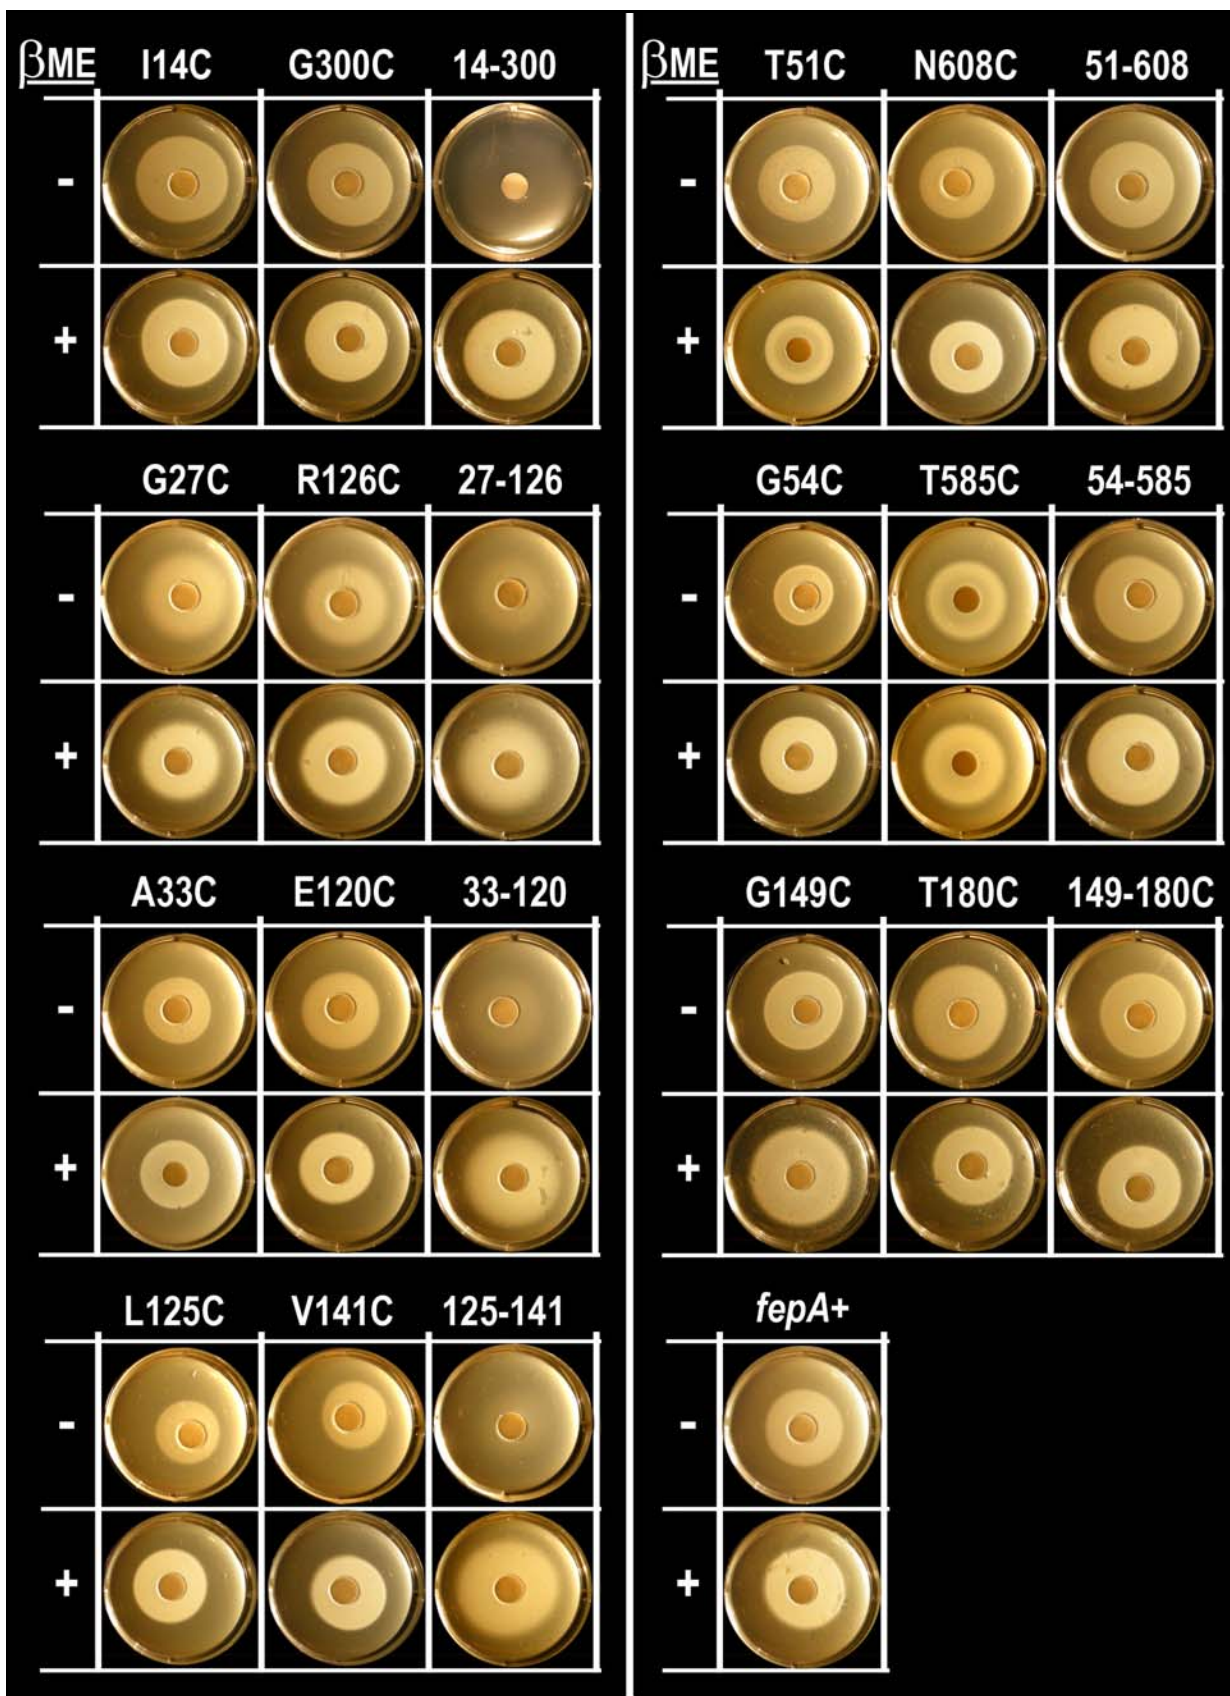

**Figure S2. Siderophore nutrition tests of single and double Cys mutants in FepA.** We assayed FeEnt utilization by OKN3 ( $\Delta fepA$ )/pITS23 (*fepA*<sup>+</sup>) and its derivatives carrying engineered Cys substitutions in *fepA*, in the absence and presence of  $\beta$ ME (1 mM). None of the single mutants showed defects in FeEnt uptake, but four intra - N double mutants (left column) were unable to efficiently acquire FeEnt, unless tested in the presence of  $\beta$ ME. Inter - N-C Cys-pairs (right column), on the other hand, did not require  $\beta$ ME for FeEnt transport.
